# Supplementary material for: Tailored rigidity of W/O Pickering emulsions using diacylglycerol-based surface-active solid lipid nanoparticles
Source: Royal Society of Chemistry journal article supplement (doi:10.1039/d1fo01883c), 2021-01-01
Supplement: d1fo01883c1.pdf [file d1fo01883c1.pdf]

## Supporting Information

### Tailored rigidity of W/O Pickering emulsions using diacylglycerol-based surface-active solid lipid nanoparticles

Guoyan Li<sup>ab</sup>, Wan Jun Lee<sup>ab</sup>, Chin Ping Tan<sup>c</sup>, Oi Ming Lai<sup>d</sup>, Yong Wang<sup>ab\*</sup>, Chaoying

Qiu<sup>ab\*</sup>

<sup>a</sup> JNU-UPM International Joint Laboratory on Plant Oil Processing and Safety, Department of Food Science and Engineering, Jinan University, Guangzhou 510632, China.

<sup>b</sup> Guangdong International Joint Research Center for Oilseed Biorefinery, Nutrition and Safety, Guangzhou 510632, China.

<sup>c</sup> Department of Food Technology, Faculty of Food Science and Technology, Universiti Putra Malaysia, 43300 Selangor, Malaysia

<sup>d</sup> Department of Bioprocess Technology, Faculty of Biotechnology & Biomolecular Sciences, Universiti Putra Malaysia, 43300 Selangor, Malaysia

\* Corresponding author

**Chaoying Qiu**, Department of Food Science and Engineering, Jinan University, Guangzhou 510632, China. Telephone: +86-020-85227126. Fax: +86-020-85226630. Email: [tcyqiu@jnu.edu.cn](mailto:tcyqiu@jnu.edu.cn)

**Yong Wang**, Department of Food Science and Engineering, Jinan University, Guangzhou 510632, China. Telephone: +86-020-85227126. Fax: +86-020-85226630. Email: [twyong@jnu.edu.cn](mailto:twyong@jnu.edu.cn)

**This file includes:**

**Fig S1.** Visual appearances of W/O emulsions with SLN: oil mass ratio of 6: 4 and 4:6 after storage at 22 °C for 4 weeks.

**Fig S2.** The recovery ratio of W/O emulsions with water: oil ratio of 6:4 and 4: 6.

**Fig S3.** Droplet size distribution of W/O emulsions with water: oil ratio of 6:4 and 4: 6.

**Table S1.** Particle size and PDI of SLNs prepared with or without addition of surfactants.

**Table S2.** Melting and crystallization temperatures and enthalpies of bulk fat and SLNs.

**Table S3.** Surface-average diameter of the emulsions stabilized by SLN: oil ratios of 4:6 and 6:4.

## Figures

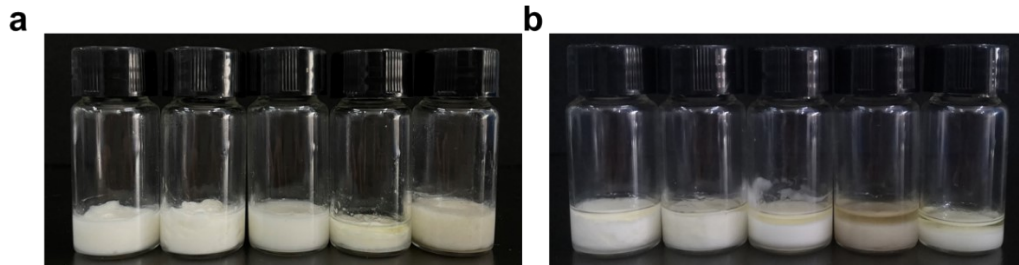

**Fig S1.** Visual appearances of W/O emulsions with SLN: oil mass ratio of 6: 4 (a) and 4: 6 (b) after storage at 22 °C for 4 weeks.

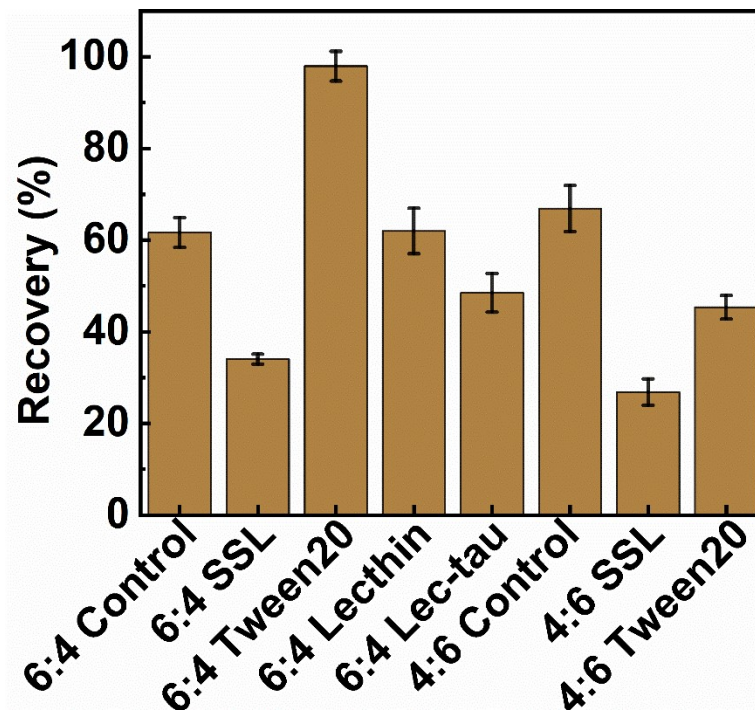

**Fig S2.** The recovery ratio of W/O emulsions with water: oil ratio of 6:4 and 4: 6.

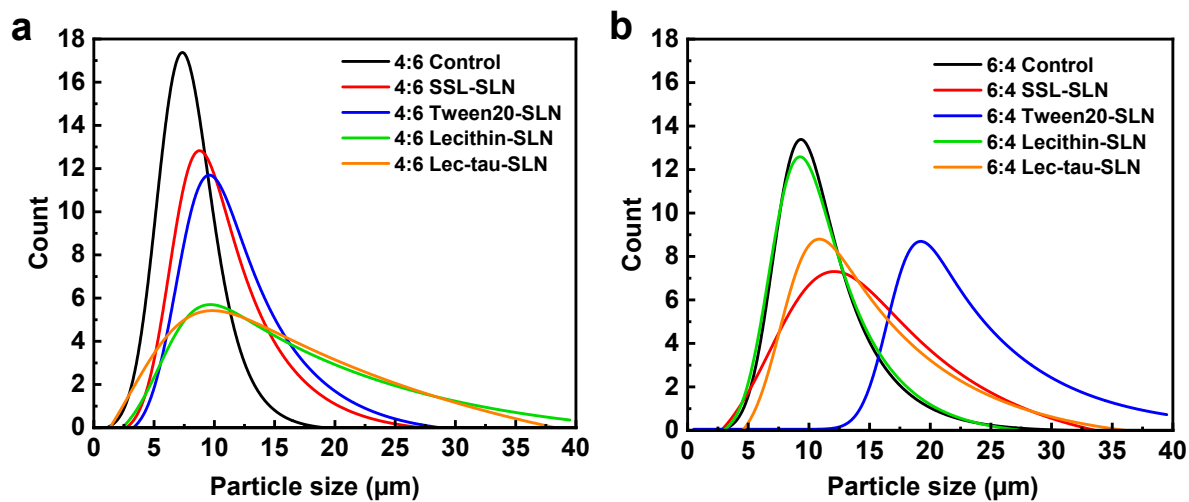

**Fig S3.** Droplet size distribution of emulsions with water: oil ratio of 4: 6 (a) and 6:4 (b).

## Tables

**Table S1.** Particle size and PDI of DAG particles prepared with or without addition of surfactants.

|               |       | Samples |       |          |          |          |         |          |          |          |
|---------------|-------|---------|-------|----------|----------|----------|---------|----------|----------|----------|
| Control       |       | 0.8%    | 1.2%  | 0.8%     | 1.2%     | 2%       | 2%      | 0.8%     | 1.2%     | 2%       |
|               |       | SSL     | SSL   | Lecithin | Lecithin | Lecithin | lec-tau | Tween 20 | Tween 20 | Tween 20 |
| Particle size | 306.4 | 166.6   | 232.7 | 275.67   | 292.95   | 218.6    | 225.1   | 342.3    | 222.43   | 126.6    |
| (nm)          | ±5.31 | ±1.9    | ±3.48 | ±6.32    | ±3.6     | ±0.5     | ±0.9    | ±0.29    | ±3.96    | ±0.75    |
| PDI           | 0.46  | 0.19    | 0.27  | 0.30     | 0.38     | 0.34     | 0.24    | 0.38     | 0.34     | 0.29     |
|               | ±0.06 | ±0.02   | ±0.04 | ±0.06    | ±0.02    | ±0.01    | ±0.01   | ±0.05    | ±0.03    | ±0.01    |

**Table S2.** Melting and crystallization temperatures and enthalpies of bulk fat and SLNs.

| Samples       | DSC heating curve |                | DSC cooling curve       |                |
|---------------|-------------------|----------------|-------------------------|----------------|
|               | Melting peak (°C) | Enthalpy (J/g) | T <sub>onset</sub> (°C) | Enthalpy (J/g) |
| Bulk fat      | 1: 51.37±0.13     | 1: -29.69±0.18 | 58.48±0.056             | 1: 27.34±0.06  |
|               | 2: 57.04±0.10     | 2: -2.62±0.16  |                         | 2: 9.36±0.15   |
|               | 3: 68.55±0.07     | 3: -39.82±0.12 |                         | 3: 7.73±0.01   |
| SSL           | 1: 40.80±0.12     | 1: -4.52±0.04  | 45.38±0.05              | 1: 31.85±0.12  |
|               | 2: 47.49±0.03     | 2: -11.04±0.06 |                         | 2: 3.99±0.14   |
|               | 3: 50.90±0.02     | 3: -0.55±0.11  |                         |                |
| Control-SLN   | 1: 50.89±0.47     | 1: -0.12±0.05  | 53.65±0.07              | 1: 0.23±0.01   |
|               | 2: 65.05±0.01     | 2: -1.82±0.06  |                         | 2: 0.31±0.09   |
|               |                   |                |                         | 3: 2.51±0.08   |
| 0.8% SSL      | 1: 55.73±0.38     | 1: -0.45±0.06  | 51.18 ±0. 06            | 1: 0.70±0.05   |
|               | 2: 59.81±0.15     | 2: -0.42±0.03  |                         | 2: 1.59±0.04   |
| 1.2% SSL      | 1: 55.06±0.42     | 1: -0.27±0.02  | 50.83±0.1               | 1: 1.62±0.22   |
|               | 2: 58.72±0.03     | 2: -0.18±0.04  |                         | 2: 1.08±0.20   |
| 0.8% lecithin | 1: 52.24±0.16     | 1: -0.25±0.09  | 55.46±0.18              | 1: 0.94±0.01   |
|               | 2: 63.73±0.21     | 2: -1.07±0.11  |                         | 2: 0.99±0.02   |
|               |                   |                |                         | 3: 0.77±0.06   |
| 1.2% lecithin | 1: 51.63±0.06     | 1: -1.36±0.01  | 54.06±0.02              | 1: 0.8±0.13    |
|               | 2: 63.38±0.03     | 2: -1.16±0.39  |                         | 2: 0.4±0.02    |
|               |                   |                |                         | 3: 0.75±0.05   |
| 2% lecithin   | 1: 53.07±0.14     | 1: -0.68±0.06  | 46.16±0.01              | 1: 0.81±0.05   |
|               | 2: 63.48±0.38     | 2: -0.56±0.17  |                         | 2: 0.6±0.07    |
|               |                   |                |                         | 3: 0.49±0.08   |
| 2% lec-tau    | 1: 50.72±0.05     | 1: -1.36±0.01  | 41.75±0.22              | 1: 4.96±0.01   |
|               | 2: 64.88±0.03     | 2: -2.06±0.01  |                         |                |
| 0.8% Tween 20 | 1: 52.30±0.4      | 1: -1.80±0.04  | 41.36±0.21              | 1: 0.28±0.05   |
|               | 2: 64.07±0.04     | 2: -1.06±0.02  |                         | 2: 2.13±0.09   |
| 1.2% Tween 20 | 1: 52.47±0.46     | 1: -2.48±0.09  | 37.92±0.21              | 1: 6.77±0.95   |
|               | 2: 62.97±0.04     | 2: -0.94±0.05  |                         |                |
| 2% Tween 20   | 1: 53.47±0.74     | 1: -2.16±0.06  | 37.11±0.43              | 1: 7.09±1.09   |
|               | 2: 62.23±0.02     | 2: -0.11±0.08  |                         |                |

**Table S3.** Surface-average diameter of the emulsions stabilized by SLN: oil ratios of 4:6 and 6:4.

|     | Control<br>SLN   | SSL-<br>SLN      | Tween 20-<br>SLN | lecithin-<br>SLN | lec-tau-<br>SLN  |
|-----|------------------|------------------|------------------|------------------|------------------|
| 4:6 | $7.89 \pm 0.64$  | $10.99 \pm 1.22$ | $11.39 \pm 0.19$ | $17.35 \pm 1.02$ | $14.48 \pm 0.10$ |
| 6:4 | $11.04 \pm 0.53$ | $13.12 \pm 1.36$ | $23.01 \pm 2.23$ | $11.72 \pm 1.66$ | $14.68 \pm 0.27$ |
